# Supplementary material
Source: publisher figshare collection journal article supplement (https://sage.figshare.com/ndownloader/files/12750293)
Supplement: Supplementary file 1 [file 12750293]

| Book | Verse | Text                                                                   | Id | Fn | Hd | Choice | Reason       | Notes                                           | land | city | nation |
|------|-------|------------------------------------------------------------------------|----|----|----|--------|--------------|-------------------------------------------------|------|------|--------|
| GEN  | 10:10 | "centers of his kingdom were \\Babylon\\, Erech, Akkad and Calneh, in  | 1  |    |    | city   | ext.context  | From ch 11                                      |      |      | 1      |
| GEN  | 11:9  | "\f h \fr 11:9 "\ft That is, \\Babylon\\; \fq Babel \ft sounds like    | 2  |    |    | city   | imm.context  | Explicit mention of city                        |      |      | 1      |
| 2KI  | 17:24 | "Assyria brought people from \\Babylon\\, Cuthah, Avva, Hamath and     | 3  |    |    | city   | imm.context  | List of cities                                  |      |      | 1      |
| 2KI  | 17:30 | "\v 30 The men from \\Babylon\\ made Succoth Benoth, the men           | 4  |    |    | city   | imm.context  | List of cities                                  |      |      | 1      |
| 2KI  | 20:12 | "son of Baladan king of \\Babylon\\ sent Hezekiah letters and a        | 5  |    |    | land   | coll.king    |                                                 | 1    |      |        |
| 2KI  | 20:14 | "replied. "They came from \\Babylon\\.                                 | 6  |    |    | land   | imm.context  | Same verse                                      | 1    |      |        |
| 2KI  | 20:17 | "day, will be carried off to \\Babylon\\. Nothing will be left, says   | 7  |    |    | city   | coll.vessels |                                                 |      | 1    |        |
| 2KI  | 20:18 | "in the palace of the king of \\Babylon\\.                             | 8  |    |    | land   | coll.king    |                                                 | 1    |      |        |
| 2KI  | 24:1  | "Nebuchadnezzar king of \\Babylon\\ invaded the land, and              | 9  |    |    | land   | coll.king    |                                                 | 1    |      |        |
| 2KI  | 24:7  | "again, because the king of \\Babylon\\ had taken all his territory,   | 10 |    |    | land   | coll.king    |                                                 | 1    |      |        |
| 2KI  | 24:10 | "of Nebuchadnezzar king of \\Babylon\\ advanced on Jerusalem and       | 11 |    |    | land   | coll.king    |                                                 | 1    |      |        |
| 2KI  | 24:12 | "of the reign of the king of \\Babylon\\, he took Jehoiachin prisoner. | 12 |    |    | land   | coll.king    |                                                 | 1    |      |        |
| 2KI  | 24:15 | "took Jehoiachin captive to \\Babylon\\. He also took from Jerusalem   | 13 |    |    | city   | ext.context  | See 2KI 25:28 - prison and palace are in city   |      | 1    |        |
| 2KI  | 24:15 | "also took from Jerusalem to \\Babylon\\ the king's mother, his wives, | 14 |    |    | city   | imm.context  | remainder of verse                              |      | 1    |        |
| 2KI  | 24:16 | "\v 16 The king of \\Babylon\\ also deported to Babylon the            | 15 |    |    | land   | coll.king    |                                                 | 1    |      |        |
| 2KI  | 24:16 | "of Babylon also deported to \\Babylon\\ the entire force of seven     | 16 |    |    | city   | imm.context  | verse 15                                        |      | 1    |        |
| 2KI  | 24:20 | "rebelled against the king of \\Babylon\\.                             | 17 |    |    | land   | coll.king    |                                                 | 1    |      |        |
| 2KI  | 25:1  | "Nebuchadnezzar king of \\Babylon\\ marched against Jerusalem          | 18 |    |    | land   | coll.king    |                                                 | 1    |      |        |
| 2KI  | 25:6  | "He was taken to the king of \\Babylon\\ at Riblah, where sentence was | 19 |    |    | land   | coll.king    |                                                 | 1    |      |        |
| 2KI  | 25:7  | "shackles and took him to \\Babylon\\.                                 | 20 |    |    | city   | ext.context  | See 2KI 25:28 - prison and palace are in city   |      | 1    |        |
| 2KI  | 25:8  | "of Nebuchadnezzar king of \\Babylon\\, Nebuzaradan commander of the   | 21 |    |    | land   | coll.king    |                                                 | 1    |      |        |
| 2KI  | 25:8  | "an official of the king of \\Babylon\\, came to Jerusalem.            | 22 |    |    | land   | coll.king    |                                                 | 1    |      |        |
| 2KI  | 25:11 | "had gone over to the king of \\Babylon\\.                             | 23 |    |    | land   | coll.king    |                                                 | 1    |      |        |
| 2KI  | 25:13 | "they carried the bronze to \\Babylon\\.                               | 24 |    |    | city   | imm.context  | extension of vs 7                               |      | 1    |        |
| 2KI  | 25:20 | "brought them to the king of \\Babylon\\ at Riblah.                    | 25 |    |    | land   | coll.king    |                                                 | 1    |      |        |
| 2KI  | 25:22 | "\v 22 Nebuchadnezzar king of \\Babylon\\ appointed Gedaliah son of    | 26 |    |    | land   | coll.king    |                                                 | 1    |      |        |
| 2KI  | 25:23 | "men heard that the king of \\Babylon\\ had appointed Gedaliah as      | 27 |    |    | land   | coll.king    |                                                 | 1    |      |        |
| 2KI  | 25:24 | "land and serve the king of \\Babylon\\, and it will go well with      | 28 |    |    | land   | coll.king    |                                                 | 1    |      |        |
| 2KI  | 25:27 | " became king of \\Babylon\\, he released Jehoiachin from              | 29 |    |    | land   | coll.king    |                                                 | 1    |      |        |
| 2KI  | 25:28 | "kings who were with him in \\Babylon\\.                               | 30 |    |    | city   | imm.context  | prison and palace are in the city (capital)     |      | 1    |        |
| 1CH  | 9:1   | "Judah were taken captive to \\Babylon\\ because of their              | 31 |    |    | land   | coll.exile   |                                                 | 1    |      |        |
| 2CH  | 32:31 | "were sent by the rulers of \\Babylon\\ to ask him about the           | 32 |    |    | land   | coll.king    | rulers of and king of Babylon both involve lanc | 1    |      |        |
| 2CH  | 33:11 | "shackles and took him to \\Babylon\\.                                 | 33 |    |    | city   | imm.context  | the king of country Assyria brings M to city B  |      | 1    |        |
| 2CH  | 36:6  | "\v 6 Nebuchadnezzar king of \\Babylon\\ attacked him and bound him    | 34 |    |    | land   | coll.king    |                                                 | 1    |      |        |
| 2CH  | 36:6  | "shackles to take him to \\Babylon\\.                                  | 35 |    |    | city   | ext.context  | See 2KI 25:28 - prison and palace are in city   |      | 1    |        |
| 2CH  | 36:7  | "Nebuchadnezzar also took to \\Babylon\\ articles from the temple of   | 36 |    |    | city   | coll.temple  |                                                 |      | 1    |        |
| 2CH  | 36:10 | "for him and brought him to \\Babylon\\, together with articles of     | 37 |    |    | city   | ext.context  | See 2KI 25:28 - prison and palace are in city   |      | 1    |        |
| 2CH  | 36:18 | "\v 18 He carried to \\Babylon\\ all the articles from the             | 38 |    |    | city   | coll.vessels |                                                 |      | 1    |        |
| 2CH  | 36:20 | "20 He carried into exile to \\Babylon\\ the remnant, who escaped from | 39 |    |    | land   | coll.exile   |                                                 | 1    |      |        |
| EZR  | 1:11  | "when the exiles came up from \\Babylon\\ to Jerusalem.                | 40 |    |    | land   | coll.exile   |                                                 | 1    |      |        |
| EZR  | 2:1   | "whom Nebuchadnezzar king of \\Babylon\\ had taken captive to Babylon  | 41 |    |    | land   | coll.king    |                                                 | 1    |      |        |
| EZR  | 2:1   | "Babylon had taken captive to \\Babylon\\ (they returned to Jerusalem  | 42 |    |    | land   | coll.exile   |                                                 | 1    |      |        |
| EZR  | 4:9   | " Erech and \\Babylon\\, the Elamites of Susa,                         | 43 |    |    | city   | imm.context  | List of cities                                  |      | 1    |        |
| EZR  | 5:12  | "the Chaldean, king of \\Babylon\\, who destroyed this temple          | 44 |    |    | land   | coll.king    |                                                 | 1    |      |        |
| EZR  | 5:12  | "and deported the people to \\Babylon\\.                               | 45 |    |    | land   | coll.exile   |                                                 | 1    |      |        |
| EZR  | 5:13  | "first year of Cyrus king of \\Babylon\\, King Cyrus issued a decree   | 46 |    |    | land   | coll.king    |                                                 | 1    |      |        |
| EZR  | 5:14  | " of \\Babylon\\ the gold and silver articles                          | 47 |    |    | city   | coll.temple  |                                                 |      | 1    |        |

|     |       |                                                                        |    |      |               |                                               |   |
|-----|-------|------------------------------------------------------------------------|----|------|---------------|-----------------------------------------------|---|
| EZR | 5:14  | " in \\Babylon\\.                                                      | 48 | city | coll.temple   |                                               | 1 |
| EZR | 5:17  | "in the royal archives of \\Babylon\\ to see if King Cyrus did in      | 49 | city | logical       | royal archives in city of king                | 1 |
| EZR | 6:1   | "stored in the treasury at \\Babylon\\.                                | 50 | city | logical       | treasury in palace in city of king            | 1 |
| EZR | 6:5   | "in Jerusalem and brought to \\Babylon\\, are to be returned to their  | 51 | city | coll.vessels  |                                               | 1 |
| EZR | 7:6   | "\v 6 this Ezra came up from \\Babylon\\. He was a teacher well versed | 52 | city | imm.context   | see verse 9                                   | 1 |
| EZR | 7:9   | "had begun his journey from \\Babylon\\ on the first day of the first  | 53 | city | logical       | from city to city                             | 1 |
| EZR | 7:16  | "obtain from the province of \\Babylon\\, as well as the freewill      | 54 | land | explicit      |                                               | 1 |
| EZR | 8:1   | "who came up with me from \\Babylon\\ during the reign of King         | 55 | land | coll.exile    | more families involved, so part of the exiles | 1 |
| NEH | 7:6   | "whom Nebuchadnezzar king of \\Babylon\\ had taken captive (they       | 56 | land | coll.king     |                                               | 1 |
| NEH | 13:6  | "year of Artaxerxes king of \\Babylon\\ I had returned to the king.    | 57 | land | coll.king     |                                               | 1 |
| EST | 2:6   | "by Nebuchadnezzar king of \\Babylon\\, among those taken captive      | 58 | land | coll.king     |                                               | 1 |
| PSA | 87:4  | "poetic name for Egypt\}* and \\Babylon\\                              | 59 | land | imm.context   | Comparison with Egypt                         | 1 |
| PSA | 137:1 | "\v 1 By the rivers of \\Babylon\\ we sat and wept                     | 60 | land | coll.exile    |                                               | 1 |
| PSA | 137:8 | "\v 8 O Daughter of \\Babylon\\, doomed to destruction,                | 61 | city | coll.daughter |                                               | 1 |
| ISA | 13:1  | "\v 1 An oracle concerning \\Babylon\\ that Isaiah son of Amoz saw:    | 62 | land | ext.context   | from verse 19                                 | 1 |
| ISA | 13:19 | "\v 19 \\Babylon\\, the jewel of kingdoms,                             | 63 | land | imm.context   | parallelism: Babylon = kingdom = land         | 1 |
| ISA | 14:4  | "taunt against the king of \\Babylon\\:                                | 64 | land | coll.king     |                                               | 1 |
| ISA | 14:22 | "q1 "I will cut off from \\Babylon\\ her name and survivors,           | 65 | city | imm.context   | Place for owls in vs 23                       | 1 |
| ISA | 21:9  | "q2 \\Babylon\\ has fallen, has fallen!                                | 66 | city | coll.fallen   |                                               | 1 |
| ISA | 39:1  | "son of Baladan king of \\Babylon\\ sent Hezekiah letters and a        | 67 | land | coll.king     |                                               | 1 |
| ISA | 39:3  | ""They came to me from \\Babylon\\.                                    | 68 | land | imm.context   | from a distant country = from Babylon         | 1 |
| ISA | 39:6  | "day, will be carried off to \\Babylon\\. Nothing will be left, says   | 69 | land | coll.exile    |                                               | 1 |
| ISA | 39:7  | "in the palace of the king of \\Babylon\\.                             | 70 | land | coll.king     |                                               | 1 |
| ISA | 43:14 | "your sake I will send to \\Babylon\\                                  | 71 | land | imm.context   | parallelism                                   | 1 |
| ISA | 47:1  | "q2 Virgin Daughter of \\Babylon\\;                                    | 72 | city | coll.daughter |                                               | 1 |
| ISA | 48:14 | "out his purpose against \\Babylon\\;                                  | 73 | land | imm.context   | parallelism                                   | 1 |
| ISA | 48:20 | "\v 20 Leave \\Babylon\\,                                              | 74 | land | imm.context   | parallelism                                   | 1 |
| JER | 20:4  | "Judah over to the king of \\Babylon\\, who will carry them away to    | 75 | land | coll.king     |                                               | 1 |
| JER | 20:4  | "who will carry them away to \\Babylon\\ or put them to the sword.     | 76 | land | coll.exile    |                                               | 1 |
| JER | 20:5  | "plunder and carry it off to \\Babylon\\.                              | 77 | land | coll.exile    |                                               | 1 |
| JER | 20:6  | "house will go into exile to \\Babylon\\. There you will die and be    | 78 | land | coll.exile    | Specific location of Passhur?                 | 1 |
| JER | 21:2  | " king of \\Babylon\\ is attacking us. Perhaps the                     | 79 | land | coll.king     |                                               | 1 |
| JER | 21:4  | "using to fight the king of \\Babylon\\ and the Babylonians\}* I \}*fr | 80 | land | coll.king     |                                               | 1 |
| JER | 21:7  | "to Nebuchadnezzar king of \\Babylon\\ and to their enemies who seek   | 81 | land | coll.king     |                                               | 1 |
| JER | 21:10 | "the hands of the king of \\Babylon\\, and he will destroy it with     | 82 | land | coll.king     |                                               | 1 |
| JER | 22:25 | "Nebuchadnezzar king of \\Babylon\\ and to the Babylonians.\}*p        | 83 | land | coll.king     |                                               | 1 |
| JER | 24:1  | "into exile from Jerusalem to \\Babylon\\ by Nebuchadnezzar king of    | 84 | city | ext.context   | See 2Ki 25:28 - prison and palace are in city | 1 |
| JER | 24:1  | "by Nebuchadnezzar king of \\Babylon\\, the \}*nd Lord\}* showed me    | 85 | land | coll.king     |                                               | 1 |
| JER | 25:1  | "of Nebuchadnezzar king of \\Babylon\\.                                | 86 | land | coll.king     |                                               | 1 |
| JER | 25:9  | "Nebuchadnezzar king of \\Babylon\\, declares the \}*nd Lord\}*,       | 87 | land | coll.king     |                                               | 1 |
| JER | 25:11 | "will serve the king of \\Babylon\\ seventy years.                     | 88 | land | coll.king     |                                               | 1 |
| JER | 25:12 | "I will punish the king of \\Babylon\\ and his nation, the land of     | 89 | land | coll.king     |                                               | 1 |
| JER | 27:6  | "Nebuchadnezzar king of \\Babylon\\; I will make even the wild         | 90 | land | coll.king     |                                               | 1 |
| JER | 27:8  | "serve Nebuchadnezzar king of \\Babylon\\ or bow its neck under his    | 91 | land | coll.king     |                                               | 1 |
| JER | 27:9  | "will not serve the king of \\Babylon\\."                              | 92 | land | coll.king     |                                               | 1 |
| JER | 27:11 | "the yoke of the king of \\Babylon\\ and serve him, I will let         | 93 | land | coll.king     |                                               | 1 |
| JER | 27:12 | "the yoke of the king of \\Babylon\\; serve him and his people,        | 94 | land | coll.king     |                                               | 1 |
| JER | 27:14 | "will not serve the king of \\Babylon\\," for they are prophesying     | 95 | land | coll.king     |                                               | 1 |

|     |       |                                                                          |     |      |              |                                                 |   |
|-----|-------|--------------------------------------------------------------------------|-----|------|--------------|-------------------------------------------------|---|
| JER | 27:16 | "will be brought back from \\Babylon\\. ' They are prophesying lies      | 96  | city | coll.vessels | see 2CH                                         | 1 |
| JER | 27:17 | "to them. Serve the king of \\Babylon\\, and you will live. Why          | 97  | land | coll.king    |                                                 | 1 |
| JER | 27:18 | "in Jerusalem not be taken to \\Babylon\\.                               | 98  | city | coll.vessels |                                                 | 1 |
| JER | 27:20 | "which Nebuchadnezzar king of \\Babylon\\ did not take away when he      | 99  | land | coll.king    |                                                 | 1 |
| JER | 27:20 | "into exile from Jerusalem to \\Babylon\\, along with all the nobles of  | 100 | city | ext.context  | See 2KI 25:28 - prison and palace are in city   | 1 |
| JER | 27:22 | "v 22 'They will be taken to \\Babylon\\ and there they will remain      | 101 | city | coll.vessels |                                                 | 1 |
| JER | 28:2  | "the yoke of the king of \\Babylon\\.                                    | 102 | land | coll.king    |                                                 | 1 |
| JER | 28:3  | "that Nebuchadnezzar king of \\Babylon\\ removed from here and took to   | 103 | land | coll.king    |                                                 | 1 |
| JER | 28:3  | "from here and took to \\Babylon\\.                                      | 104 | city | coll.vessels |                                                 | 1 |
| JER | 28:4  | "from Judah who went to \\Babylon\\, ' declares the \\nd Lord\\nd*,      | 105 | city | ext.context  | See 2KI 25:28 - prison and palace are in city   | 1 |
| JER | 28:4  | "the yoke of the king of \\Babylon\\.                                    | 106 | land | coll.king    |                                                 | 1 |
| JER | 28:6  | "back to this place from \\Babylon\\.                                    | 107 | city | coll.vessels |                                                 | 1 |
| JER | 28:11 | "of Nebuchadnezzar king of \\Babylon\\ off the neck of all the           | 108 | land | coll.king    |                                                 | 1 |
| JER | 28:14 | "serve Nebuchadnezzar king of \\Babylon\\, and they will serve him. I    | 109 | land | coll.king    |                                                 | 1 |
| JER | 29:1  | "into exile from Jerusalem to \\Babylon\\.                               | 110 | city | coll.vessels |                                                 | 1 |
| JER | 29:3  | "to King Nebuchadnezzar in \\Babylon\\. It said:                         | 111 | city | logical      | repetition (k.o.Babylon in Babylon) dictates th | 1 |
| JER | 29:4  | "into exile from Jerusalem to \\Babylon\\:                               | 112 | land | coll.exile   |                                                 | 1 |
| JER | 29:10 | "years are completed for \\Babylon\\, I will come to you and             | 113 | land | coll.exile   |                                                 | 1 |
| JER | 29:15 | "raised up prophets for us in \\Babylon\\,                               | 114 | land | coll.exile   |                                                 | 1 |
| JER | 29:20 | "sent away from Jerusalem to \\Babylon\\.                                | 115 | land | coll.exile   |                                                 | 1 |
| JER | 29:21 | "to Nebuchadnezzar king of \\Babylon\\, and he will put them to          | 116 | land | coll.king    |                                                 | 1 |
| JER | 29:22 | "exiles from Judah who are in \\Babylon\\ will use this curse: 'The \\nd | 117 | land | coll.exile   |                                                 | 1 |
| JER | 29:22 | "and Ahab, whom the king of \\Babylon\\ burned in the fire.'             | 118 | land | coll.king    |                                                 | 1 |
| JER | 29:28 | "sent this message to us in \\Babylon\\: It will be a long time.         | 119 | land | coll.exile   |                                                 | 1 |
| JER | 32:2  | "v 2 The army of the king of \\Babylon\\ was then besieging Jerusalem,   | 120 | land | coll.king    |                                                 | 1 |
| JER | 32:3  | "city over to the king of \\Babylon\\, and he will capture it.           | 121 | land | coll.king    |                                                 | 1 |
| JER | 32:4  | "handed over to the king of \\Babylon\\, and will speak with him face    | 122 | land | coll.king    |                                                 | 1 |
| JER | 32:5  | "5 He will take Zedekiah to \\Babylon\\, where he will remain until I    | 123 | city | ext.context  | Zedekiah: see ezk 17:16                         | 1 |
| JER | 32:28 | "to Nebuchadnezzar king of \\Babylon\\, who will capture it.             | 124 | land | coll.king    |                                                 | 1 |
| JER | 32:36 | "handed over to the king of \\Babylon\\; but this is what the \\nd       | 125 | land | coll.king    |                                                 | 1 |
| JER | 34:1  | "While Nebuchadnezzar king of \\Babylon\\ and all his army and all the   | 126 | land | coll.king    |                                                 | 1 |
| JER | 34:2  | "city over to the king of \\Babylon\\, and he will burn it down.         | 127 | land | coll.king    |                                                 | 1 |
| JER | 34:3  | "You will see the king of \\Babylon\\ with your own eyes, and he         | 128 | land | coll.king    |                                                 | 1 |
| JER | 34:3  | "to face. And you will go to \\Babylon\\.                                | 129 | city | ext.context  | Zedekiah: see ezk 17:16                         | 1 |
| JER | 34:7  | "the army of the king of \\Babylon\\ was fighting against                | 130 | land | coll.king    |                                                 | 1 |
| JER | 34:21 | "to the army of the king of \\Babylon\\, which has withdrawn from        | 131 | land | coll.king    |                                                 | 1 |
| JER | 35:11 | "when Nebuchadnezzar king of \\Babylon\\ invaded this land, we said,     | 132 | land | coll.king    |                                                 | 1 |
| JER | 36:29 | "write on it that the king of \\Babylon\\ would certainly come and       | 133 | land | coll.king    |                                                 | 1 |
| JER | 37:1  | "by Nebuchadnezzar king of \\Babylon\\; he reigned in place of           | 134 | land | coll.king    |                                                 | 1 |
| JER | 37:17 | "handed over to the king of \\Babylon\\.                                 | 135 | land | coll.king    |                                                 | 1 |
| JER | 37:19 | "to you, 'The king of \\Babylon\\ will not attack you or this            | 136 | land | coll.king    |                                                 | 1 |
| JER | 38:3  | "to the army of the king of \\Babylon\\, who will capture it.'           | 137 | land | coll.king    |                                                 | 1 |
| JER | 38:17 | "the officers of the king of \\Babylon\\, your life will be spared and   | 138 | land | coll.king    |                                                 | 1 |
| JER | 38:18 | "the officers of the king of \\Babylon\\, this city will be handed       | 139 | land | coll.king    |                                                 | 1 |
| JER | 38:22 | "the officials of the king of \\Babylon\\. Those women will say to you:  | 140 | land | coll.king    |                                                 | 1 |
| JER | 38:23 | "be captured by the king of \\Babylon\\; and this city will\\f g\\fr     | 141 | land | coll.king    |                                                 | 1 |
| JER | 39:1  | "Nebuchadnezzar king of \\Babylon\\ marched against Jerusalem            | 142 | land | coll.king    |                                                 | 1 |
| JER | 39:3  | "the officials of the king of \\Babylon\\ came and took seats in the     | 143 | land | coll.king    |                                                 | 1 |

|     |       |                                                                         |     |        |                 |                                            |   |   |
|-----|-------|-------------------------------------------------------------------------|-----|--------|-----------------|--------------------------------------------|---|---|
| JER | 39:3  | "officials of the king of \\Babylon\\.                                  | 144 | land   | coll.king       |                                            | 1 |   |
| JER | 39:5  | "to Nebuchadnezzar king of \\Babylon\\ at Riblah in the land of         | 145 | land   | coll.king       |                                            | 1 |   |
| JER | 39:6  | "There at Riblah the king of \\Babylon\\ slaughtered the sons of        | 146 | land   | coll.king       |                                            | 1 |   |
| JER | 39:7  | "shackles to take him to \\Babylon\\.                                   | 147 | city   | ext.context     | Zedekiah: see ezk 17:16                    |   | 1 |
| JER | 39:9  | "guard carried into exile to \\Babylon\\ the people who remained in     | 148 | land   | coll.exile      |                                            | 1 |   |
| JER | 39:11 | "Now Nebuchadnezzar king of \\Babylon\\ had given these orders about    | 149 | land   | coll.king       |                                            | 1 |   |
| JER | 39:13 | "officers of the king of \\Babylon\\                                    | 150 | land   | coll.king       |                                            | 1 |   |
| JER | 40:1  | "being carried into exile to \\Babylon\\.                               | 151 | land   | coll.exile      |                                            | 1 |   |
| JER | 40:4  | "your wrists. Come with me to \\Babylon\\, if you like, and I will look | 152 | land   | coll.exile      |                                            | 1 |   |
| JER | 40:5  | "of Shaphan, whom the king of \\Babylon\\ has appointed over the towns  | 153 | land   | coll.king       |                                            | 1 |   |
| JER | 40:7  | "heard that the king of \\Babylon\\ had appointed Gedaliah son of       | 154 | land   | coll.king       |                                            | 1 |   |
| JER | 40:7  | "been carried into exile to \\Babylon\\,                                | 155 | land   | coll.exile      |                                            | 1 |   |
| JER | 40:9  | "land and serve the king of \\Babylon\\, and it will go well with       | 156 | land   | coll.king       |                                            | 1 |   |
| JER | 40:11 | "heard that the king of \\Babylon\\ had left a remnant in Judah         | 157 | land   | coll.king       |                                            | 1 |   |
| JER | 41:2  | "the one whom the king of \\Babylon\\ had appointed as governor         | 158 | land   | coll.king       |                                            | 1 |   |
| JER | 41:18 | "of Ahikam, whom the king of \\Babylon\\ had appointed as governor      | 159 | land   | coll.king       |                                            | 1 |   |
| JER | 42:11 | "not be afraid of the king of \\Babylon\\, whom you now fear. Do not be | 160 | land   | coll.king       |                                            | 1 |   |
| JER | 43:3  | "us or carry us into exile to \\Babylon\\.                              | 161 | land   | coll.exile      |                                            | 1 |   |
| JER | 43:10 | "Nebuchadnezzar king of \\Babylon\\, and I will set his throne          | 162 | land   | coll.king       |                                            | 1 |   |
| JER | 44:30 | "to Nebuchadnezzar king of \\Babylon\\, the enemy who was seeking       | 163 | land   | coll.king       |                                            | 1 |   |
| JER | 46:2  | "by Nebuchadnezzar king of \\Babylon\\ in the fourth year of            | 164 | land   | coll.king       |                                            | 1 |   |
| JER | 46:13 | "of Nebuchadnezzar king of \\Babylon\\ to attack Egypt:                 | 165 | land   | coll.king       |                                            | 1 |   |
| JER | 46:26 | "to Nebuchadnezzar king of \\Babylon\\ and his officers. Later,         | 166 | land   | coll.king       |                                            | 1 |   |
| JER | 49:28 | "which Nebuchadnezzar king of \\Babylon\\ attacked:                     | 167 | land   | coll.king       |                                            | 1 |   |
| JER | 49:30 | "q1 "Nebuchadnezzar king of \\Babylon\\ has plotted against you;        | 168 | land   | coll.king       |                                            | 1 |   |
| JER | 50:1  | "the prophet concerning \\Babylon\\ and the land of the                 | 169 | city   | ext.context     | See 50:14-15                               |   | 1 |
| JER | 50:2  | "q1 "Babylon\\ will be captured;                                        | 170 | city   | ext.context     | See 50:14-15                               |   | 1 |
| JER | 50:8  | "v 8 "Flee out of \\Babylon\\;                                          | 171 | city   | ext.context     | See 50:14-15                               |   | 1 |
| JER | 50:9  | "stir up and bring against \\Babylon\\                                  | 172 | city   | ext.context     | See 50:14-15                               |   | 1 |
| JER | 50:13 | "q1 All who pass \\Babylon\\ will be horrified and scoff                | 173 | city   | ext.context     | See 50:14-15                               |   | 1 |
| JER | 50:14 | "up your positions around \\Babylon\\,                                  | 174 | city   | imm.context     |                                            |   | 1 |
| JER | 50:16 | "v 16 Cut off from \\Babylon\\ the sower,                               | 175 | land   | logical         | sowing and harvesting are done in a land   | 1 |   |
| JER | 50:17 | "was Nebuchadnezzar king of \\Babylon\\.                                | 176 | land   | coll.king       |                                            | 1 |   |
| JER | 50:18 | "I will punish the king of \\Babylon\\ and his land                     | 177 | land   | coll.king       |                                            | 1 |   |
| JER | 50:23 | "q1 How desolate is \\Babylon\\                                         | 178 | nation | imm.context     | Compare Babylon with other nations         |   | 1 |
| JER | 50:24 | "24 I set a trap for you, O \\Babylon\\,                                | 179 | nation | personification |                                            |   | 1 |
| JER | 50:28 | "fugitives and refugees from \\Babylon\\                                | 180 | land   | explicit        | from the land Babylon                      | 1 |   |
| JER | 50:29 | "29 "Summon archers against \\Babylon\\,                                | 181 | city   | logical         | city attack (encamp around her)            |   | 1 |
| JER | 50:34 | "unrest to those who live in \\Babylon\\.                               | 182 | land   | imm.context     | 33 speaks about captives = deported people | 1 |   |
| JER | 50:35 | "against those who live in \\Babylon\\                                  | 183 | land   | imm.context     | parallelism                                | 1 |   |
| JER | 50:42 | "to attack you, O Daughter of \\Babylon\\.                              | 184 | city   | coll.daughter   |                                            |   | 1 |
| JER | 50:43 | "v 43 The king of \\Babylon\\ has heard reports about them,             | 185 | land   | coll.king       |                                            | 1 |   |
| JER | 50:44 | "q1 I will chase \\Babylon\\ from its land in an instant.               | 186 | land   | logical         | Because of the 'position someone over it'  | 1 |   |
| JER | 50:45 | "Lord\\nd* has planned against \\Babylon\\,                             | 187 | city   | imm.context     | Must be the same as v 46                   |   | 1 |
| JER | 50:46 | At the sound of the capture of \\Babylon\\ the earth shall tremble,     | 188 | city   | ext.context     | See 50:14-15                               |   | 1 |
| JER | 51:1  | "q2 against \\Babylon\\ and the people of Leb                           | 189 | city   | ext.context     | taken from 51:6                            |   | 1 |
| JER | 51:2  | "2 I will send foreigners to \\Babylon\\                                | 190 | city   | ext.context     | taken from 51:6                            |   | 1 |
| JER | 51:6  | "v 6 "Flee from \\Babylon\\!                                            | 191 | city   | ext.context     | See 50:14-15                               |   | 1 |

|     |       |                                                                        |     |        |                 |                                                  |   |   |
|-----|-------|------------------------------------------------------------------------|-----|--------|-----------------|--------------------------------------------------|---|---|
| JER | 51:7  | "v 7 \\Babylon\\ was a gold cup in the \\nd                            | 192 | nation | imm.context     | comparison with other nations                    |   | 1 |
| JER | 51:8  | "v 8 \\Babylon\\ will suddenly fall and be                             | 193 | city   | coll.fallen     |                                                  | 1 |   |
| JER | 51:9  | "v 9 " "We would have healed \\Babylon\\,                              | 194 | nation | personification |                                                  |   | 1 |
| JER | 51:11 | "his purpose is to destroy \\Babylon\\.                                | 195 | city   | coll.fallen     | The Lord intends to destroy the CITY (not the \\ | 1 |   |
| JER | 51:12 | "banner against the walls of \\Babylon\\!                              | 196 | city   | imm.context     | city has walls                                   | 1 |   |
| JER | 51:12 | "decree against the people of \\Babylon\\.                             | 197 | city   | imm.context     | city has walls                                   | 1 |   |
| JER | 51:24 | "your eyes I will repay \\Babylon\\ and all who live in                | 198 | nation | imm.context     | it is humans ('they' have done evil)             |   | 1 |
| JER | 51:29 | "Lord\\nd*'s purposes against \\Babylon\\ stand--                      | 199 | nation | imm.context     | First line of parallelism continues from vs 24   |   | 1 |
| JER | 51:29 | "q1 to lay waste the land of \\Babylon\\                               | 200 | land   | explicit        | verse says so                                    | 1 |   |
| JER | 51:31 | "to announce to the king of \\Babylon\\                                | 201 | land   | coll.king       |                                                  | 1 |   |
| JER | 51:33 | "q1 "The Daughter of \\Babylon\\ is like a threshing floor             | 202 | city   | coll.daughter   |                                                  | 1 |   |
| JER | 51:34 | "34 "Nebuchadnezzar king of \\Babylon\\ has devoured us,               | 203 | land   | coll.king       |                                                  | 1 |   |
| JER | 51:35 | " be upon \\Babylon\\,                                                 | 204 | city   | imm.context     | punishment on city Babylon + country             | 1 |   |
| JER | 51:37 | "v 37 \\Babylon\\ will be a heap of ruins,                             | 205 | city   | coll.fallen     | utter destruction for the city                   | 1 |   |
| JER | 51:41 | "ft is a cryptogram for \\Babylon\\.\f*                                | 206 | city   | coll.fallen     |                                                  | 1 |   |
| JER | 51:41 | "q1 What a horror \\Babylon\\ will be                                  | 207 | city   | coll.fallen     |                                                  | 1 |   |
| JER | 51:42 | "v 42 The sea will rise over \\Babylon\\;                              | 208 | land   | imm.context     | due to verse 43 'her cities'                     | 1 |   |
| JER | 51:44 | "v 44 I will punish Bel in \\Babylon\\                                 | 209 | city   | coll.fallen     | reference to temple of Bel in Babylon?           | 1 |   |
| JER | 51:44 | "q2 And the wall of \\Babylon\\ will fall.                             | 210 | city   | coll.fallen     |                                                  | 1 |   |
| JER | 51:47 | "I will punish the idols of \\Babylon\\;                               | 211 | nation | coll.idols      |                                                  |   | 1 |
| JER | 51:48 | "q2 will shout for joy over \\Babylon\\,                               | 212 | nation | imm.context     | logical consequence of vs 47                     |   | 1 |
| JER | 51:49 | "v 49 "\\Babylon\\ must fall because of Israel's                       | 213 | nation | personification |                                                  |   | 1 |
| JER | 51:49 | "q2 have fallen because of \\Babylon\\.                                | 214 | nation | personification |                                                  |   | 1 |
| JER | 51:53 | "v 53 Even if \\Babylon\\ reaches the sky                              | 215 | nation | personification |                                                  |   | 1 |
| JER | 51:54 | "sound of a cry comes from \\Babylon\\,                                | 216 | city   | coll.fallen     |                                                  | 1 |   |
| JER | 51:55 | "nd Lord\\nd* will destroy \\Babylon\\;                                | 217 | city   | coll.fallen     |                                                  | 1 |   |
| JER | 51:56 | "destroyer will come against \\Babylon\\;                              | 218 | city   | coll.fallen     |                                                  | 1 |   |
| JER | 51:59 | "of Mahseiah, when he went to \\Babylon\\ with Zedekiah king of Judah  | 219 | city   | ext.context     | due to other choices for Zedekiah                | 1 |   |
| JER | 51:60 | "had been recorded concerning \\Babylon\\.                             | 220 | city   | coll.fallen     |                                                  | 1 |   |
| JER | 51:61 | "to Seraiah, "When you get to \\Babylon\\, see that you read all these | 221 | city   | coll.fallen     |                                                  | 1 |   |
| JER | 51:64 | "v 64 Then say, 'So will \\Babylon\\ sink to rise no more because      | 222 | nation | personification |                                                  |   | 1 |
| JER | 52:3  | "rebelled against the king of \\Babylon\\.                             | 223 | land   | coll.king       |                                                  | 1 |   |
| JER | 52:4  | "Nebuchadnezzar king of \\Babylon\\ marched against Jerusalem          | 224 | land   | coll.king       |                                                  | 1 |   |
| JER | 52:9  | "He was taken to the king of \\Babylon\\ at Riblah in the land of      | 225 | land   | coll.king       |                                                  | 1 |   |
| JER | 52:10 | "There at Riblah the king of \\Babylon\\ slaughtered the sons of       | 226 | land   | coll.king       |                                                  | 1 |   |
| JER | 52:11 | "shackles and took him to \\Babylon\\, where he put him in prison      | 227 | city   | ext.context     | Zedekiah: see ezk 17:16                          | 1 |   |
| JER | 52:12 | "of Nebuchadnezzar king of \\Babylon\\, Nebuzaradan commander of the   | 228 | land   | coll.king       |                                                  | 1 |   |
| JER | 52:12 | "who served the king of \\Babylon\\, came to Jerusalem.                | 229 | land   | coll.king       |                                                  | 1 |   |
| JER | 52:15 | "had gone over to the king of \\Babylon\\.                             | 230 | land   | coll.king       |                                                  | 1 |   |
| JER | 52:17 | "carried all the bronze to \\Babylon\\.                                | 231 | city   | coll.vessels    |                                                  | 1 |   |
| JER | 52:26 | "brought them to the king of \\Babylon\\ at Riblah.                    | 232 | land   | coll.king       |                                                  | 1 |   |
| JER | 52:31 | " became king of \\Babylon\\, he released Jehoiachin king              | 233 | land   | coll.king       |                                                  | 1 |   |
| JER | 52:32 | "kings who were with him in \\Babylon\\.                               | 234 | city   | ext.context     | Zedekiah: see ezk 17:16                          | 1 |   |
| JER | 52:34 | "v 34 Day by day the king of \\Babylon\\ gave Jehoiachin a regular     | 235 | land   | coll.king       |                                                  | 1 |   |
| EZK | 12:13 | snare; I will bring him to \\Babylonia\\, the land of the Chaldeans,   | 236 | land   | imm.context     | parallelism                                      | 1 |   |
| EZK | 17:12 | "Say to them: 'The king of \\Babylon\\ went to Jerusalem and carried   | 237 | land   | coll.king       |                                                  | 1 |   |
| EZK | 17:12 | "them back with him to \\Babylon\\.                                    | 238 | city   | imm.context     | see verse 16                                     | 1 |   |
| EZK | 17:16 | "Lord\\nd*, he shall die in \\Babylon\\, in the land of the king who   | 239 | city   | logical         | in the place of the king = in Babylon city       | 1 |   |

|     |       |                                                                         |     |      |               |                                            |   |
|-----|-------|-------------------------------------------------------------------------|-----|------|---------------|--------------------------------------------|---|
| EZK | 17:20 | "snare. I will bring him to \\Babylon\\ and execute judgment upon him   | 240 | city | imm.context   | see verse 16                               | 1 |
| EZK | 19:9  | "brought him to the king of \\Babylon\\.                                | 241 | land | coll.king     |                                            | 1 |
| EZK | 21:19 | "for the sword of the king of \\Babylon\\ to take, both starting from   | 242 | land | coll.king     |                                            | 1 |
| EZK | 21:21 | "v 21 For the king of \\Babylon\\ will stop at the fork in the          | 243 | land | coll.king     |                                            | 1 |
| EZK | 24:2  | "date, because the king of \\Babylon\\ has laid siege to Jerusalem      | 244 | land | coll.king     |                                            | 1 |
| EZK | 26:7  | "king of \\Babylon\\, king of kings, with horses                        | 245 | land | coll.king     |                                            | 1 |
| EZK | 29:18 | "man, Nebuchadnezzar king of \\Babylon\\ drove his army in a hard       | 246 | land | coll.king     |                                            | 1 |
| EZK | 29:19 | "to Nebuchadnezzar king of \\Babylon\\, and he will carry off its       | 247 | land | coll.king     |                                            | 1 |
| EZK | 30:10 | "of Nebuchadnezzar king of \\Babylon\\.                                 | 248 | land | coll.king     |                                            | 1 |
| EZK | 30:24 | "the arms of the king of \\Babylon\\ and put my sword in his hand,      | 249 | land | coll.king     |                                            | 1 |
| EZK | 30:25 | "the arms of the king of \\Babylon\\, but the arms of Pharaoh will      | 250 | land | coll.king     |                                            | 1 |
| EZK | 30:25 | "into the hand of the king of \\Babylon\\ and he brandishes it against  | 251 | land | coll.king     |                                            | 1 |
| EZK | 32:11 | "" 'The sword of the king of \\Babylon\\                                | 252 | land | coll.king     |                                            | 1 |
| DAN | 1:1   | "Nebuchadnezzar king of \\Babylon\\ came to Jerusalem and               | 253 | land | coll.king     |                                            | 1 |
| DAN | 1:2   | to the temple of his god in \\Babylonia\\ f a \\fr 1:2 \\ft Hebrew \\fq | 254 | city | coll.temple   |                                            | 1 |
| DAN | 2:12  | "of all the wise men of \\Babylon\\.                                    | 255 | land | coll.wisemen  | wise men                                   | 1 |
| DAN | 2:14  | "put to death the wise men of \\Babylon\\, Daniel spoke to him with     | 256 | land | coll.wisemen  | wise men                                   | 1 |
| DAN | 2:18  | "the rest of the wise men of \\Babylon\\.                               | 257 | land | coll.wisemen  | wise men                                   | 1 |
| DAN | 2:24  | "to execute the wise men of \\Babylon\\, and said to him, "Do not       | 258 | land | coll.wisemen  | wise men                                   | 1 |
| DAN | 2:24  | "not execute the wise men of \\Babylon\\. Take me to the king, and I    | 259 | land | coll.wisemen  | wise men                                   | 1 |
| DAN | 2:48  | "over the entire province of \\Babylon\\ and placed him in charge of    | 260 | land | explicit      | province                                   | 1 |
| DAN | 2:49  | "over the province of \\Babylon\\, while Daniel himself                 | 261 | land | explicit      | province                                   | 1 |
| DAN | 3:1   | "of Dura in the province of \\Babylon\\.                                | 262 | land | explicit      | province                                   | 1 |
| DAN | 3:30  | "Abednego in the province of \\Babylon\\.                               | 263 | land | explicit      | province                                   | 1 |
| DAN | 4:6   | "that all the wise men of \\Babylon\\ be brought before me to           | 264 | land | coll.wisemen  | wise men                                   | 1 |
| DAN | 4:29  | "roof of the royal palace of \\Babylon\\,                               | 265 | city | logical       | palace is in capital city                  | 1 |
| DAN | 4:30  | "said, "Is not this the great \\Babylon\\ I have built as the royal     | 266 | city | coreference   | must be same as v 29                       | 1 |
| DAN | 5:7   | "said to these wise men of \\Babylon\\, "Whoever reads this writing     | 267 | land | coll.wisemen  | wise men                                   | 1 |
| DAN | 7:1   | "year of Belshazzar king of \\Babylon\\, Daniel had a dream, and        | 268 | land | coll.king     |                                            | 1 |
| MIC | 4:10  | "q1 You will go to \\Babylon\\;                                         | 269 | land | imm.context   | extension of 'open country'                | 1 |
| ZEC | 2:7   | "who live in the Daughter of \\Babylon\\!                               | 270 | city | coll.daughter |                                            | 1 |
| ZEC | 6:10  | "who have arrived from \\Babylon\\. Go the same day to the house        | 271 | land | coll.exile    |                                            | 1 |
| MAT | 1:11  | "at the time of the exile to \\Babylon\\.                               | 272 | land | coll.exile    |                                            | 1 |
| MAT | 1:12  | "v 12 After the exile to \\Babylon\\:                                   | 273 | land | coll.exile    |                                            | 1 |
| MAT | 1:17  | "from David to the exile to \\Babylon\\, and fourteen from the exile    | 274 | land | coll.exile    |                                            | 1 |
| ACT | 7:43  | "beyond \\Babylon\\.                                                    | 275 | land | coll.exile    | exile' means land, and 'beyond' extends it | 1 |
| 1PE | 5:13  | "v 13 She who is in \\Babylon\\, chosen together with you,              | 276 | city | ext.context   | See TH and the start of 1PE                | 1 |
| REV | 14:8  | "and said, "Fallen! Fallen is \\Babylon\\ the Great, which made all the | 277 | city | coreference   | linked to 18:21                            | 1 |
| REV | 16:19 | "collapsed. God remembered \\Babylon\\ the Great and gave her the       | 278 | city | coreference   | linked to 18:21                            | 1 |
| REV | 17:5  | "pc \\BABYLON\\ THE GREAT                                               | 279 | city | coreference   | linked to 18:21                            | 1 |
| REV | 18:2  | "q1 "Fallen! Fallen is \\Babylon\\ the Great!                           | 280 | city | coreference   | linked to 18:21                            | 1 |
| REV | 18:10 | "q2 O \\Babylon\\, city of power!                                       | 281 | city | coreference   | linked to 18:21                            | 1 |
| REV | 18:21 | "q2 the great city of \\Babylon\\ will be thrown down,                  | 282 | city | explicit      |                                            | 1 |
